# Supplementary material for: Metastable and nanosize cation-disordered rocksalt-type oxides: revisit of stoichiometric LiMnO2 and NaMnO2
Source: Royal Society of Chemistry journal article supplement (doi:10.1039/c8ta03667e), 2018-01-01
Supplement: c8ta03667e1.pdf [file c8ta03667e1.pdf]

**Supporting Information for**  
**Metastable and Nanosize Cation-Disordered Rocksalt-type Oxides; Revisit on**  
**Stoichiometric LiMnO<sub>2</sub> and NaMnO<sub>2</sub>**

Takahito Sato<sup>1</sup>, Kei Sato<sup>1</sup>, Wenwen Zhao<sup>1,2</sup>, Yoshio Kajiya<sup>3</sup> and Naoaki Yabuuchi<sup>1,2,4\*</sup>

<sup>1</sup>Department of Applied Chemistry, Tokyo Denki University, 5 Asahicho Senju, Adachi, Tokyo  
120-8551, Japan

<sup>2</sup>Elements Strategy Initiative for Catalysts and Batteries, Kyoto University, f1-30 Goryo-Ohara,  
Nishikyo-ku, Kyoto 615-8245, Japan

<sup>3</sup>Technology Department, Electronic Materials Group, JX Nippon Mining & Metals Corporation,  
1-2, Otemachi 1-Chome, Chiyoda-ku, Tokyo 100-8164, Japan

<sup>4</sup>Department of Chemistry and Life Science, Yokohama National University, 79-5 Tokiwadai,  
Hodogaya-ku, Yokohama, Kanagawa 240-8501

\*Corresponding Author

E-mail: yabuuchi-naoaki-pw@ynu.ac.jp

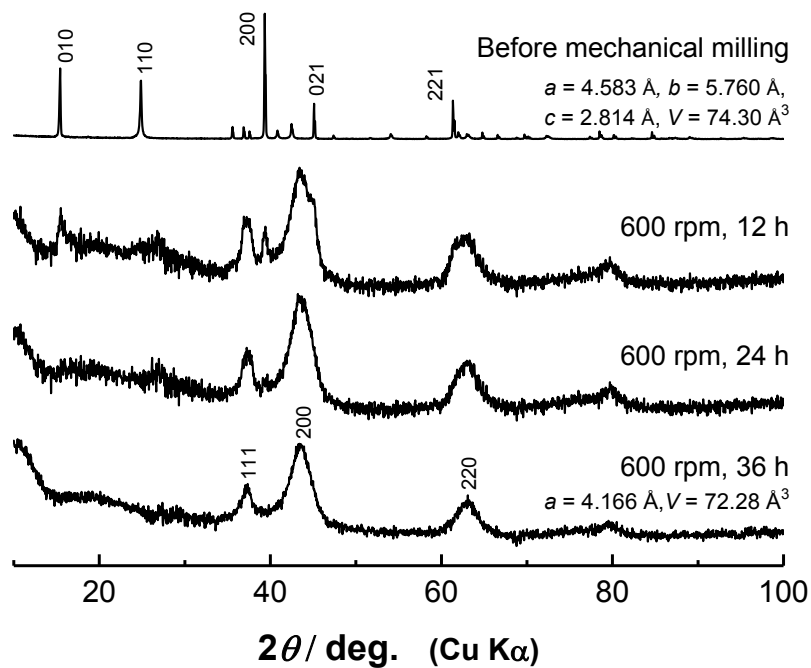

**Figure S1.** Changes in XRD patterns from zigzag-layered  $\text{LiMnO}_2$  to rocksalt  $\text{LiMnO}_2$  during mechanical milling.

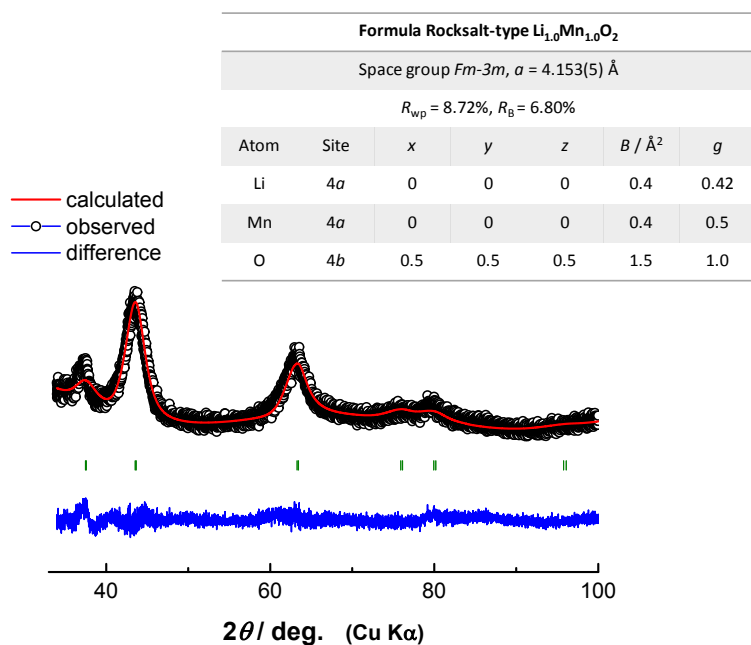

**Figure S2.** A fitting result of rocksalt  $\text{LiMnO}_2$  by Rietveld analysis. Note that the presence of defects at Li sites is considered for the analysis, which is further discussed in the later section.

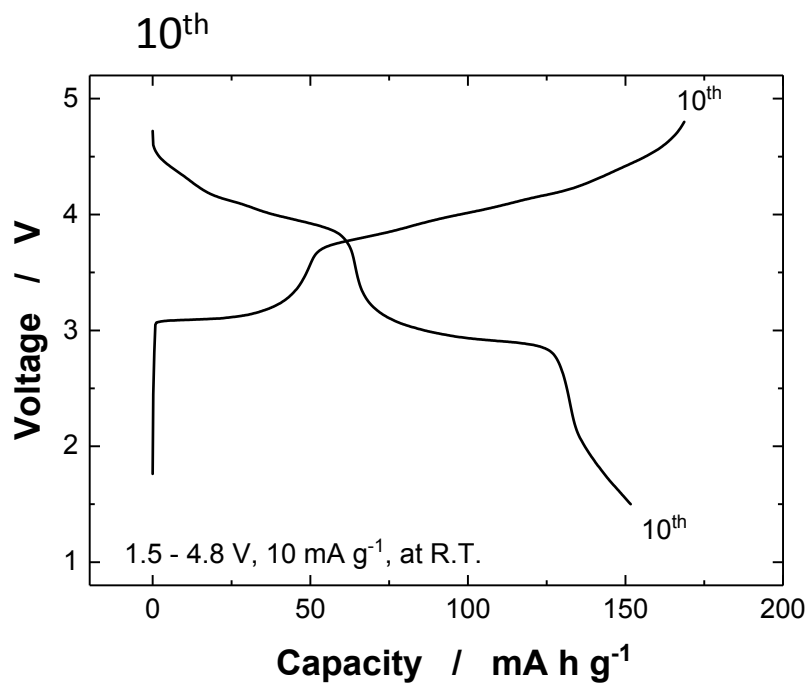

**Figure S3.** Charge/discharge curves of 10<sup>th</sup> cycle for zigzag layered LiMnO<sub>2</sub>.

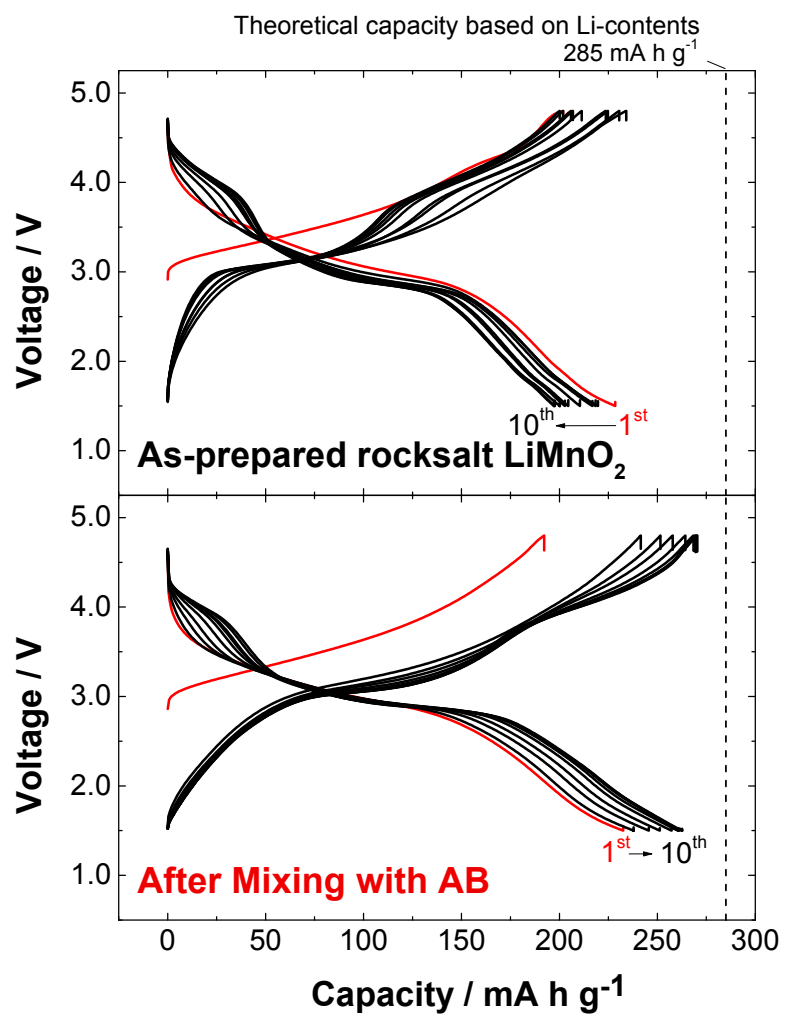

**Figure S4.** Charge/discharge curves of rocksalt  $\text{LiMnO}_2$  before/after mixing with AB by ball milling at  $10 \text{ mA g}^{-1}$ .

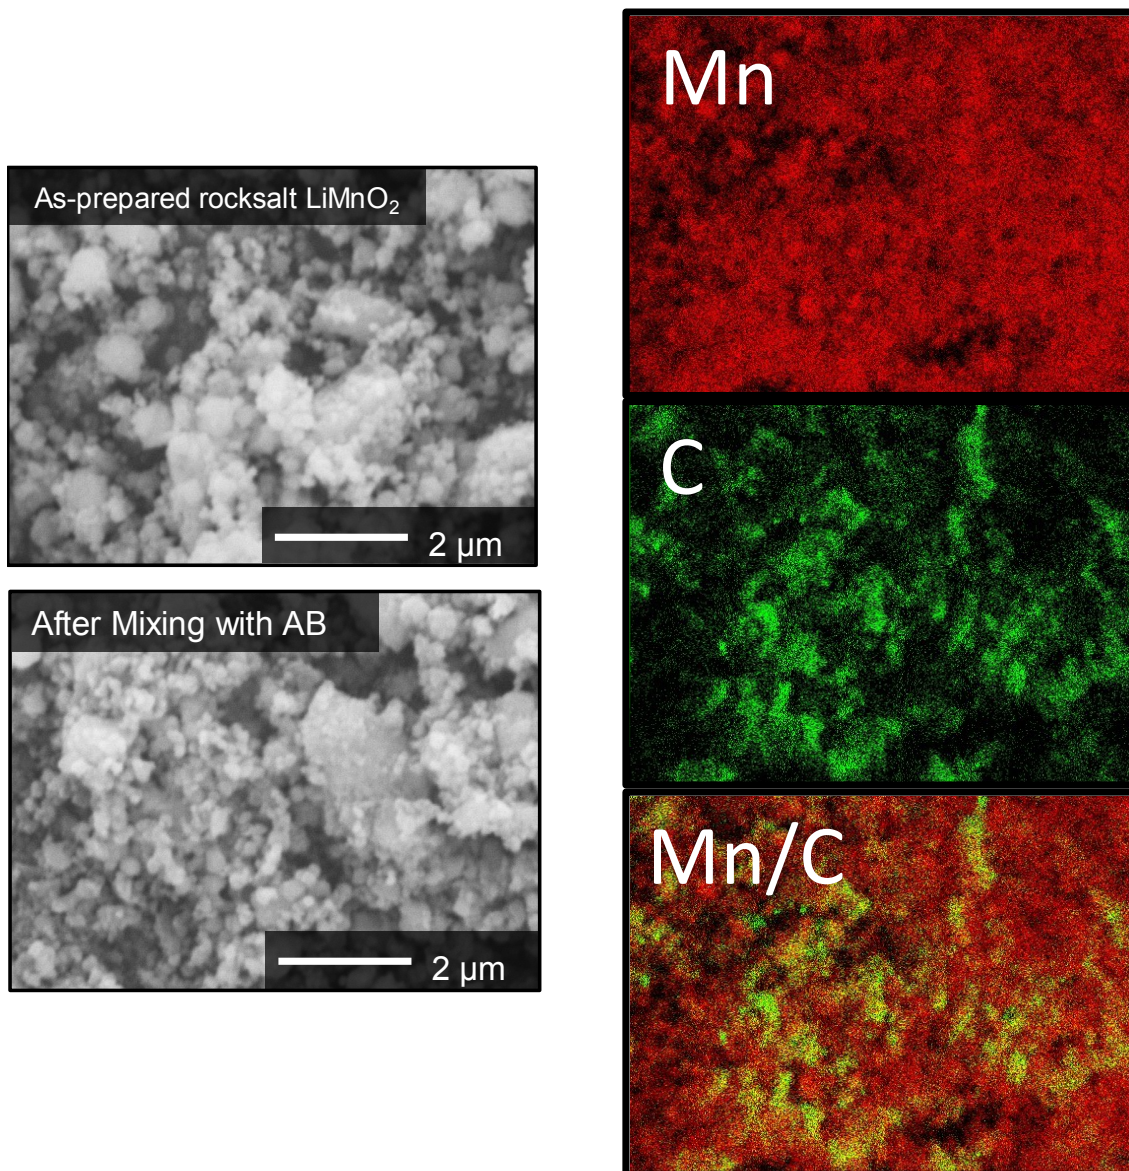

**Figure S5.** Comparison of SEM images of rocksalt LiMnO<sub>2</sub> before/after mixing with AB by ball milling. EDX mappings of the sample after milling with AB are also shown. Carbon is uniformly distributed in the sample after milling.

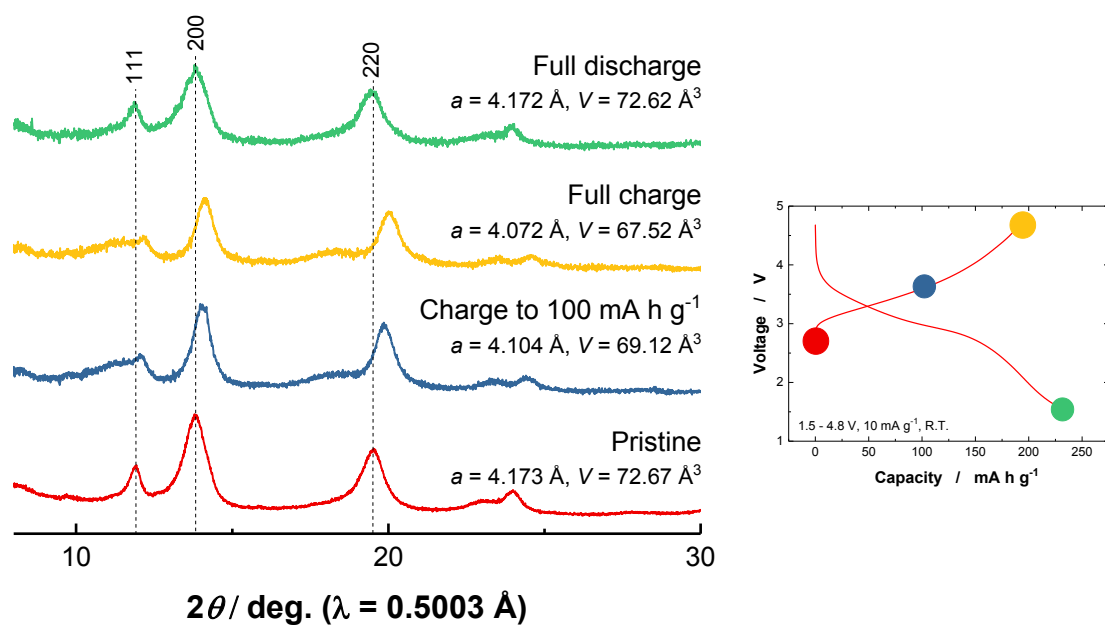

**Figure S6.** *Ex-situ* synchrotron XRD patterns of rocksalt  $\text{Li}_x\text{MnO}_2$  for the initial charge/discharge process.

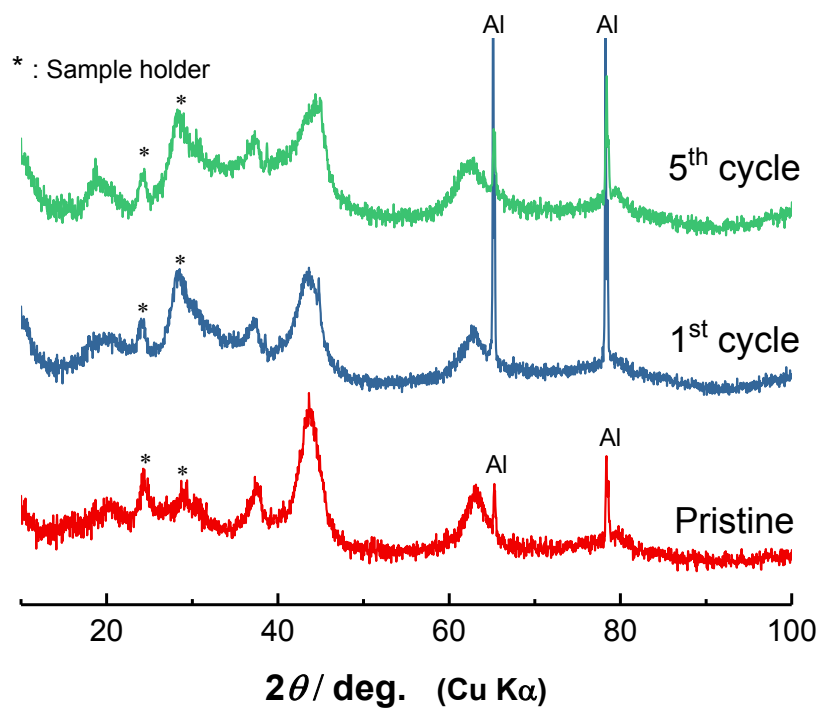

**Figure S7.** Changes in XRD patterns of rocksalt  $\text{Li}_x\text{MnO}_2$  upon electrochemical cycles.

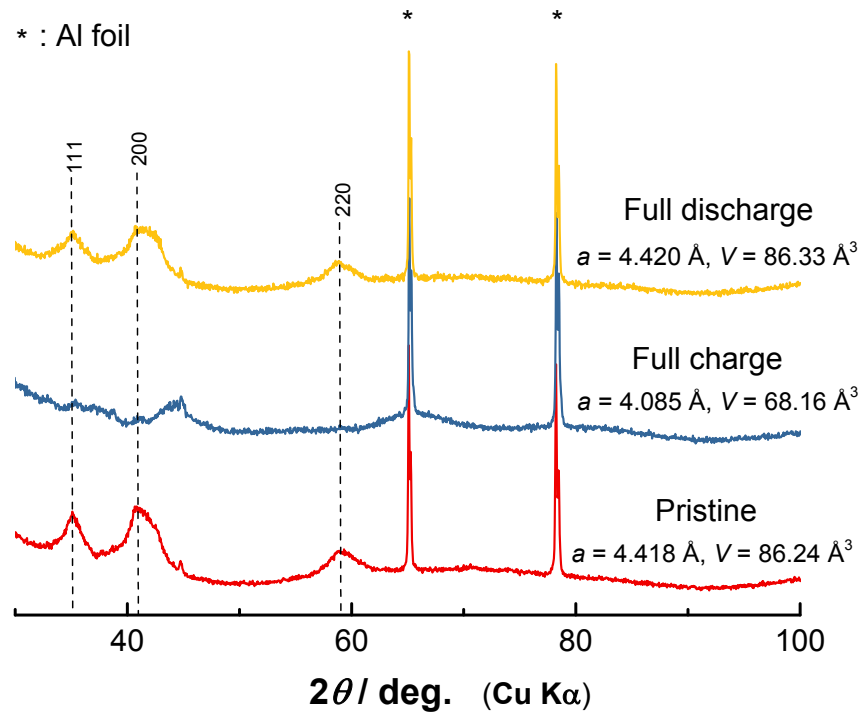

**Figure S8.** Changes in XRD patterns of rocksalt  $\text{Na}_x\text{MnO}_2$  for the initial charge/discharge process.

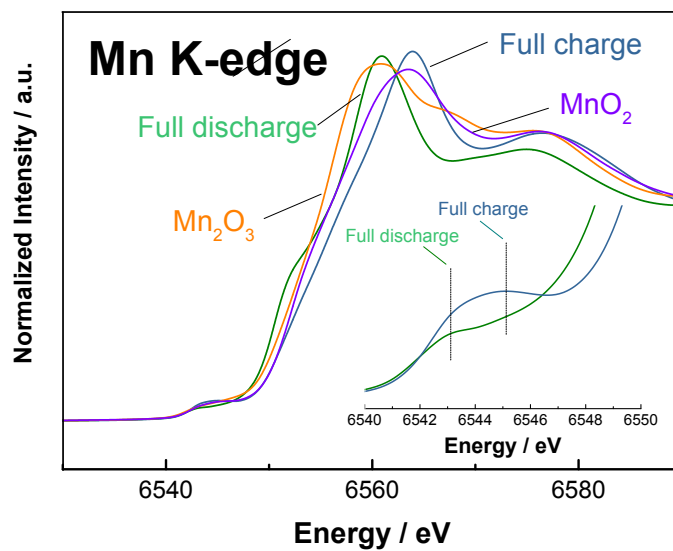

**Figure S9.** XAS spectra of fully charged/discharged rocksalt  $\text{Li}_x\text{MnO}_2$  with  $\text{Mn}_2\text{O}_3$  and  $\text{MnO}_2$  used as reference materials. Pre-edge data are also highlighted in the inset.

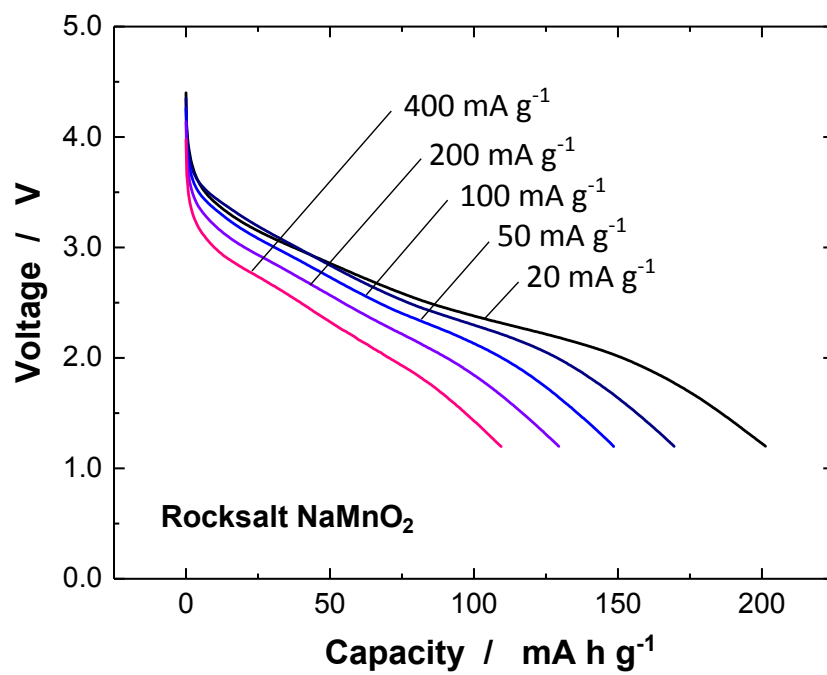

**Figure S10.** Rate capability of rocksalt Na<sub>x</sub>MnO<sub>2</sub>. The cell was charged at 10 mA g<sup>-1</sup> and then discharged at different rates. Sample loading was 1.85 mg cm<sup>-2</sup>.
